# Supplementary material
Source: PubMed Central journal article supplement (PMC2719141)
Supplement: pp.109.140251_2.pdf [file pp.109.140251_2.pdf]

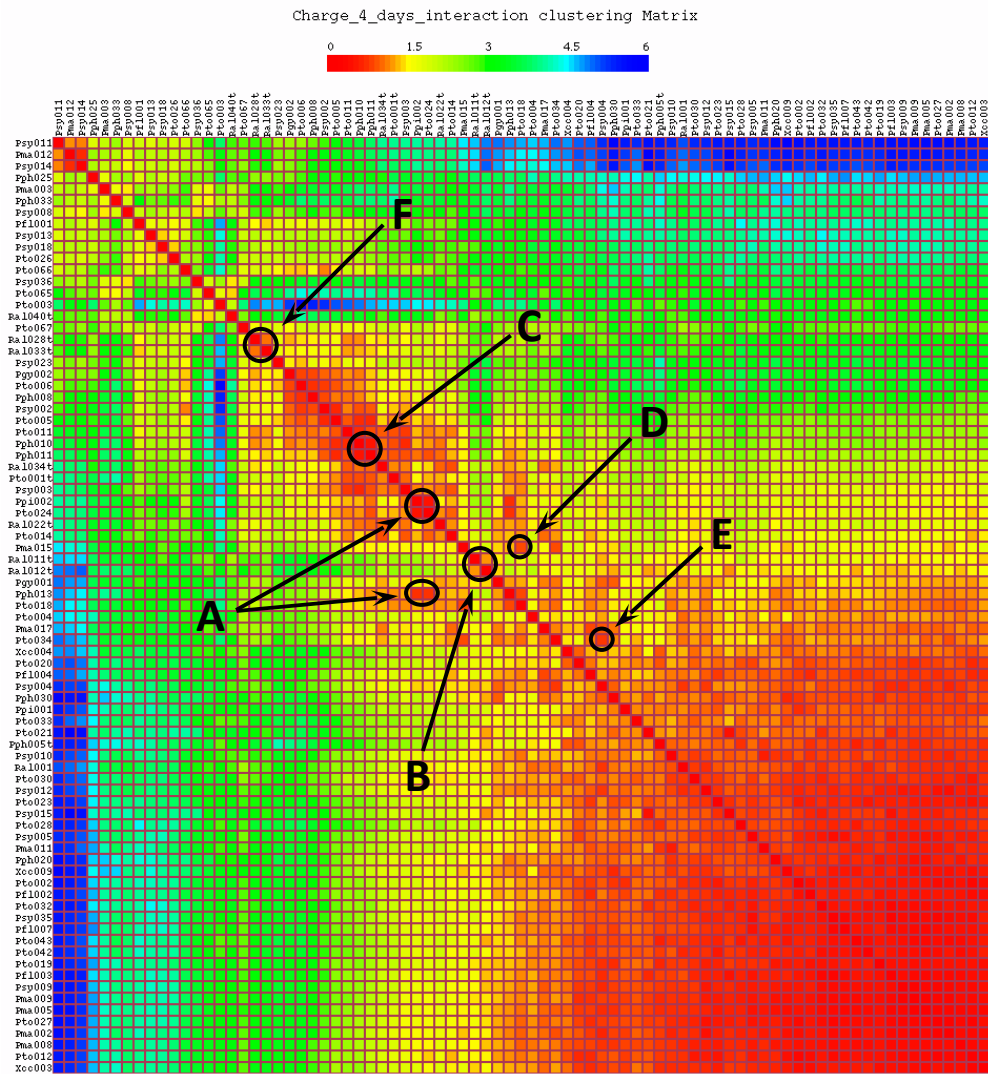

**Figure S2.** Example of a 2-D diagonal CheckMatrix heat-plot after cluster analysis of the reactions to effectors in the 59 plant accessions tested. Orange and red colors indicate similarities in the patterns produced by effectors listed on vertical and horizontal axes. Arrows indicate similarities in the patterns produced by some of the homologous and sequence-unrelated effectors displayed in Fig. 7. A – homologs of AvrRps4 from *Pto* DC3000, *Ppi* 151 and *Pph* 1448A; B – two homologs from *R. solanacearum*: RS0433<sub>RalGMI1000</sub> and BS01581<sub>RalBS048</sub>; C- two orthologs from *Pph* 1448A: AvrB4-1 and AvrB4-2; and sequence-unrelated effectors: D - HopT1-1Pma<sub>ES4326</sub> and HopE1<sub>PtoDC3000</sub>, E – HopT1-1<sub>PtoDC3000</sub> and HopAJ2<sub>PsyB728a</sub>, F – BS00576<sub>RalBS048</sub> and HopAV1<sub>RalBS048</sub>.
