# Supplementary material
Source: PubMed Central journal article supplement (PMC2719141)
Supplement: pp.109.140251_3.pdf [file pp.109.140251_3.pdf]

**Table SIII.** Segregation of the reaction determinants to seven effector proteins in three lettuce mapping populations.

| Effector                     | Ninja x Valmaine       |                | Salinas x <i>L. serriola</i> |                | Valmaine x LSE18        |                | Linkage group |
|------------------------------|------------------------|----------------|------------------------------|----------------|-------------------------|----------------|---------------|
|                              | F <sub>2</sub> progeny |                | RILs                         |                | F <sub>2</sub> analysis |                |               |
|                              | Segregation            | $\chi^2_{3:1}$ | Segregation                  | $\chi^2_{1:1}$ | Segregation             | $\chi^2_{3:1}$ |               |
| AvrRps4 <sub>Ppi151</sub>    | 81:24 <sup>a</sup>     | 0.257          | 23:16 <sup>a</sup>           | 1.26           | 44:17                   | 0.267          | 8             |
| HopK1 <sub>PtoDC3000</sub>   | 81:24 <sup>a</sup>     | 0.257          | 23:16 <sup>a</sup>           | 1.26           |                         |                | 8             |
| AvrRpm1 <sub>PmaM2</sub>     | 70:35 <sup>b</sup>     | 3.89*          |                              |                |                         |                | 1             |
| AvrB1 <sub>Pgyrace4</sub>    | 70:35 <sup>b</sup>     | 3.89*          |                              |                |                         |                | 1             |
| AvrRpt2 <sub>PtoJL1065</sub> | 70:35 <sup>b</sup>     | 3.89*          |                              |                |                         |                | 1             |
| HopC1 <sub>PtoDC3000</sub>   | 78:27                  | 0.029          |                              |                |                         |                | 8             |
| AvrPto1 <sub>PtoJL1065</sub> |                        |                |                              |                | 70:25                   | 0.088          | 9             |

<sup>a</sup> reactions to these two effectors co-segregated.

<sup>b</sup> reactions to these three effectors co-segregated.

\*  $0.01 < p < 0.05$ ; This reflects segregation distortion in the region because there was absolute co-segregation with molecular marker CLSM741.
